# Supplementary material for: Associations of Obesity With Incident Hospitalization Related to Peripheral Artery Disease and Critical Limb Ischemia in the ARIC Study
Source: PubMed Central journal article supplement — J Am Heart Assoc. 2018 Aug 9;7(16):e008644. doi: 10.1161/JAHA.118.008644 (PMC6201405; doi:10.1161/jaha.118.008644), 2018-08-09
Supplement: JAH3-7-e008644-s001.pdf [file JAH3-7-e008644-s001.pdf]

# **SUPPLEMENTAL MATERIAL**

**Table S1. Difference in log hazard ratio (95% CI) comparing PAD-with-CLI vs. PAD-without-CLI for each obesity measurement.**

| Obesity measure*    | Model | CLI vs. PAD                   |         |
|---------------------|-------|-------------------------------|---------|
|                     |       | Difference in log HR (95% CI) | P-value |
| BMI                 | 1     | 0.37 (0.33-0.41)              | <0.001  |
|                     | 2     | 0.20 (0.16-0.25)              | <0.001  |
|                     | 3     | 0.18 (0.13-0.23)              | <0.001  |
| Waist circumference | 1     | 0.32 (0.28-0.37)              | <0.001  |
|                     | 2     | 0.25 (0.20-0.30)              | <0.001  |
|                     | 3     | 0.20 (0.14-0.25)              | <0.001  |
| Waist-to-hip ratio  | 1     | 0.05 (-0.02-0.12)             | 0.14    |
|                     | 2     | 0.17 (0.09-0.25)              | <0.001  |
|                     | 3     | -0.01 (-0.10-0.08)            | 0.86    |

\*All log HRs were for per 1 SD increment of each obesity measure, and were obtained from a parametric survival-time model assuming an exponential survival distribution

Model 1: Unadjusted

Model 2: Adjusted for age, sex, race, education, smoking, history of stroke, coronary heart disease, and congestive heart failure

Model 3: Additionally adjusted for total & HDL cholesterol, systolic blood pressure, antihypertensive medications, diabetes, and GFR

BMI: body mass index; PAD: peripheral arterial disease (without CLI); CLI: critical limb ischemia

**Table S2. Hazard ratios (95% CI) for the association of abdominal obesity (based on the NCEP ATP III definition) with incident PAD-without-CLI and PAD-with-CLI, ARIC, 1987-2013.**

| Measure            | Outcome         | Model | HR (95% CI)      |
|--------------------|-----------------|-------|------------------|
| Abdominal obesity* | PAD-without-CLI | 1     | 1.03 (0.84-1.27) |
|                    | PAD-without-CLI | 2     | 1.28 (1.03-1.58) |
|                    | PAD-without-CLI | 3     | 0.90 (0.72-1.13) |
|                    | PAD-with-CLI    | 1     | 1.93 (1.44-2.57) |
|                    | PAD-with-CLI    | 2     | 1.85 (1.35-2.53) |
|                    | PAD-with-CLI    | 3     | 1.04 (0.75-1.46) |

\*NCEP ATP III abdominal obesity was defined as waist circumference cutoff >102 cm for men, and >88 cm for women.

*Model 1: Unadjusted*

*Model 2: Adjusted for age, sex, race, education, smoking, history of stroke, coronary heart disease, and congestive heart failure*

*Model 3: Additionally adjusted for total & HDL cholesterol, systolic blood pressure, antihypertensive medications, diabetes, and GFR*

*BMI: body mass index; PAD: peripheral arterial disease (without CLI); CLI: critical limb ischemia*
